# Supplementary material
Source: publisher site journal article supplement (https://www.dovepress.com/get_supplementary_file.php?f=216745-S5.xlsx)
Supplement: Supplementary file 1 [file get_supplementary_file.php]

## Sheet: cnv.all.stat
Table.S5 copy number variations(CNVs) statistics for 10 A. baumannii isolates by whole-genome resequencing
	MDR-CQA	MDR-CQB	MDR-CQC	MDR-CQD	MDR-CQE	MDR-CQF	MDR-CQG	MDR-CQH	MDR-CQI	MDR-CQJ
deletion	23	8	0	10	21	21	1	26	24	0
duplication	6	1	2	1	13	8	3	5	13	2
CNV	29	9	2	11	34	29	4	31	37	2
